## Glucose tolerance before and after renal transplantation

Henrik Andreas Bergrem<sup>1</sup>, Tone Gretland Valderhaug<sup>1,2</sup>, Anders Hartmann<sup>1</sup>, Harald Bergrem<sup>3</sup>, Jøran Hjelmæsæth<sup>4</sup> and Trond Jenssen<sup>1,5</sup>

<sup>1</sup>Department of Medicine, Oslo University Hospital Rikshospitalet, Oslo, Norway, <sup>2</sup>Department of Thoracic Surgery, Oslo University Hospital Rikshospitalet, Oslo, Norway, <sup>3</sup>Department of Medicine, Stavanger University Hospital, Stavanger, Norway, <sup>4</sup>Morbid Obesity Centre, Vestfold Hospital Trust, Tønsberg, Norway and <sup>5</sup>Institute of Clinical Medicine, University of Tromsø, Tromsø, Norway

Correspondence and offprint requests to: Henrik Andreas Bergrem; E-mail: henrik.andreas.bergrem@rikshospitalet.no

### Abstract

**Background.** Renal insufficiency predisposes to insulin resistance, hyperparathyroidism and derangements in calcium phosphate and nitrogenous compound balance, leading to pre-transplant hyperglycaemia. These metabolic risk factors are not fully corrected after renal transplantation. The present study aimed to assess the role of pre-transplant glycaemia and the named metabolic risk factors in post-transplant hyperglycaemia [PHYG; impaired fasting glucose (IFG), impaired glucose tolerance (IGT) or diabetes mellitus (DM)].

**Methods.** This is a retrospective cohort study involving 301 patients without pre-transplant DM. Measurements included a pre- and post-transplant oral glucose tolerance test (OGTT) as well as glomerular filtration rate (GFR), parathyroid hormone (PTH), phosphate, calcium and urea measured 10 weeks post-transplant. The risk of PHYG at 10 weeks post-transplant was analysed using multiple logistic regression.

**Results.** Ninety-three patients (31%) had PHYG (two IFG, 52 IGT, 39 DM). Variables associated with PHYG included pre-transplant 2-h glycaemia [OR 1.26, 95% CI (1.09, 1.46)] and post-transplant urea levels [OR 1.14, 95% CI (1.02, 1.27)]. Older age, non-Caucasian ethnicity, previous transplants,  $\geq 3$  HLA class I mismatches and high prednisolone doses were likewise associated with an increased PHYG risk (all  $P < 0.05$ ).

**Conclusions.** Pre-transplant glycaemia and high post-transplant levels of urea were associated with a greater risk of PHYG. This seemed to be independent of GFR, PTH, phosphate, calcium and traditional risk factors such as age and glucocorticoid load.

**Keywords:** hyperglycaemia; multiple imputation; oral glucose tolerance test; renal transplantation; urea

### Introduction

New-onset diabetes mellitus after transplantation (NODAT) is promoted by old age, non-Caucasian ethnicity and im-

munosuppressive drugs [1–4]. NODAT develops in 10–20% of patients after renal transplantation (RTx) and is known to reduce both patient and graft survival. In the general population [5–7] and RTx patients [8,9], even non-diabetic hyperglycaemia appears to predict mortality and cardiovascular events. Since both diabetic [diabetes mellitus (DM)] and non-diabetic hyperglycaemia [impaired fasting glucose (IFG) or impaired glucose tolerance (IGT)] are amenable to intervention post-transplant [10], early identification of patients at risk of developing any form of post-transplant hyperglycaemia is of clinical importance to prevent long-term complications.

Post-transplant hyperglycaemia (PHYG) reflects both pre-transplant and transplant-induced abnormalities in glucose metabolism. In non-diabetic patients with advanced chronic kidney disease (CKD), insulin metabolism is often abnormal [11]. Impairments in insulin secretion have been linked to calcium and parathyroid hormone (PTH) levels [12,13]. Insulin resistance appears to be associated with the retention of nitrogenous compounds such as urea, since both dialysis and low-protein diets improve insulin sensitivity in terminal CKD [14]. These metabolic derangements have received surprisingly little attention post-transplant [1–4].

In this study, pre-transplant glycaemia assessed by a standard oral glucose tolerance test (OGTT) was included in a model to predict PHYG 10 weeks post-transplant. The model also included metabolites related to post-transplant renal impairment, in addition to classical NODAT risk factors.

### Materials and methods

#### Study population and design

This is a retrospective cohort study using PHYG as the outcome of interest. All patients who underwent RTx in Norway between October 2003 and October 2005 were considered ( $n = 500$ ). All were transplanted at our centre. The following were exclusion criteria: overt pre-transplant DM (diabetic nephropathy or DM as a secondary diagnosis defined prior to the RTx work-up by fasting plasma glucose  $\geq 7.0$  mmol/L, random plasma glucose  $\geq 11.1$  mmol/L or the use of anti-diabetic medication) [15], age  $< 18$  years and loss to follow-up. A total of 301 patients were included; the disposition of patients is shown in Figure 1. Main primary renal diagnoses among in-

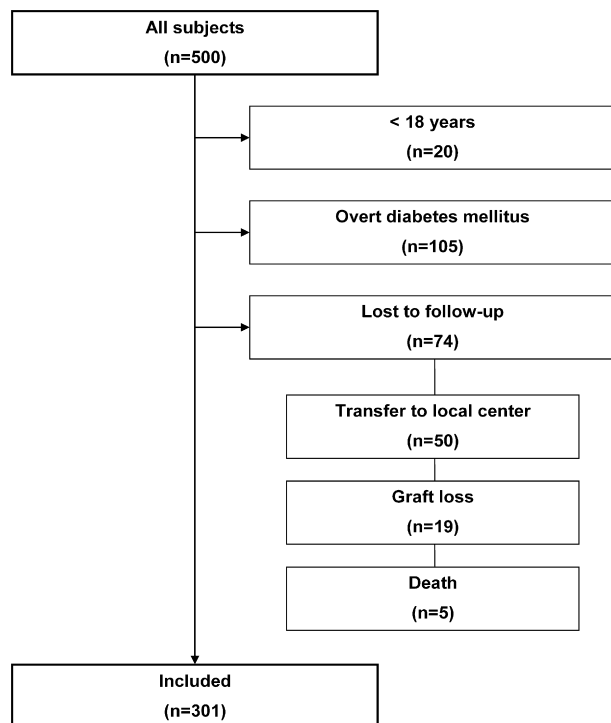

**Fig. 1.** Patient disposition. Patients with overt diabetes mellitus pre-transplant were excluded. Fifty patients were lost to follow-up due to transfer to hospitals in other parts of the country; loss to follow-up was otherwise defined by graft loss or death.

cluded patients were primary glomerulonephritis (37%), nephrosclerosis (19%), autosomal dominant polycystic kidney disease (17%) and other interstitial nephropathies (14%). All patients gave their written informed consent for the use of their data. The project was approved by the local Data Inspectorate and performed in accordance with the Declaration of Helsinki.

#### Data collection and laboratory methods

Human leukocyte antigen (HLA) was typed using immunomagnetic methods [16]. With the exception of glucose, other laboratory data were collected in the fasting state at 10 weeks post-transplant. Plasma clearance of  $^{51}\text{Cr}$ -EDTA provided the glomerular filtration rate (GFR) estimate. Phosphate was measured by ammonium molybdate methods, intact PTH by chemiluminescence immunoassays, and ionized calcium (iCa) by potentiometric methods. Reported iCa values were measured at the actual pH of each patient; phosphate was measured at a precision level of one decimal place.

Patients of European ancestry were defined as Caucasians, while non-Caucasians included patients with ethnic origins in Central Africa, the Middle East and Central or South-East Asia. None of the patients was subjected to dietary restrictions post-transplant.

#### Pre-transplant glucose tolerance

Non-diabetic patients awaiting RTx in Norway perform a mandatory standard 75-g OGTT at local centres. Numeric OGTT results are enclosed with the referral for RTx and specify whether plasma or whole blood was used. Two hundred and thirty-nine patients completed the OGTT, at a median of 50 (32–82) weeks pre-transplant. Results were reported in plasma for all but two patients and therefore considered plasma equivalent. Sixty-two patients had only fasting glucose ( $n = 38$ ) or no glucose measured ( $n = 24$ ). Despite scrutiny of clinical records, including complete referrals, no pre-transplant DM or other likely explanation could be found for the omission of these data. Missing observations were thus assumed to be missing at random (MAR; detailed below), and the patients were included in the analysis. Consequently, a total of 301 patients qual-

ified for participation in the study. Fasting (FPG) and 2-h post-challenge plasma glucose (2h-PG) are reported.

#### Post-transplant glucose tolerance

A repeat OGTT was performed 10 weeks post-transplant in all patients, except if NODAT had been diagnosed between RTx and the 10-week data collection [by fasting plasma glucose  $\geq 7.0$  mmol/L ( $\geq 126$  mg/dL), random plasma glucose  $\geq 11.1$  mmol/L ( $\geq 200$  mg/dL) or requirement of anti-diabetic medication] [15]. This OGTT was analysed in venous whole blood by a modified glucose dehydrogenase method. Using the World Health Organization criteria for venous whole blood samples, the primary endpoint, PHYG, was defined either as NODAT diagnosed ahead of the OGTT or as an abnormal post-transplant OGTT equivalent to DM [fasting glucose  $\geq 6.1$  mmol/L ( $\geq 110$  mg/dL) and/or 2-h glucose  $\geq 10.0$  mmol/L ( $\geq 180$  mg/dL)], IGT [fasting glucose  $< 6.1$  mmol/L ( $< 110$  mg/dL) and 2-h glucose 6.7–9.9 mmol/L (120–179 mg/dL)] or IFG [fasting glucose 5.6–6.0 mmol/L (100–109 mg/dL) and 2-h glucose  $< 6.7$  mmol/L ( $< 120$  mg/dL)] [15]. Glycaemia below these levels was termed normal glucose metabolism (NGM). Although PHYG was diagnosed using whole blood, glucose is reported as plasma equivalent (FPG and 2h-PG) in accordance with international recommendations (mmol/L plasma = 1.11 \* mmol/L whole blood) [17].

#### Immunosuppressive therapy

Methylprednisolone was administered intravenously on Days 0 and 1 (500 and 80 mg, respectively). Thereafter, oral prednisolone was tapered from 80 (Day 2) to 10 mg/day ( $> 8$  weeks). Mycophenolate was given as 1000 mg twice daily. Cyclosporine A or tacrolimus were given to obtain 8-week trough levels of about 150–200 or 5–8  $\mu\text{g/L}$ , respectively. Tacrolimus was primarily used if cyclosporine A was withdrawn due to rejection, toxicity or side effects. Acute rejections (biopsy-proven or  $> 20\%$  increase in creatinine) were treated with intravenous methylprednisolone (Day 0: 500 mg; Days 1–3: 250 mg/day), and subsequent increments in oral prednisolone. Cumulative glucocorticoid doses were calculated from standard regimens for the duration of follow-up, with protocol increments for acute rejections, and reported as prednisolone-equivalent. Methylprednisolone doses were multiplied by 1.25 to achieve prednisolone-equivalent doses [18].

#### Missing data

Eighty-four patients (28%) had  $\geq 1$  missing data entry (Table 1). Pre-transplant 2h-PG was the most frequently missing entry ( $n = 62$ , 21%). Patients with incomplete data were leaner and less often first-kidney recipients compared to complete cases. Since no patients had known pre-transplant DM, unmeasured OGTT results were likely to be similar to those that were measured, when controlling for previous transplants, body mass index (BMI) and other factors. Data were therefore analysed using the MAR assumption, which states that missing observations may depend on observed quantities but not on the missing values themselves [19]. Multiple imputation (MI) was used to generate 10 different data set copies, each containing 301 complete cases. Complete and incomplete variables were used as predictors during imputation. All missing observations were imputed, except for post-transplant OGTT results (missing only in NODAT patients, i.e. not MAR). Variables used for MI included: PHYG (yes), pre- and post-transplant fasting and 2-h glucose, pre-dialytic pre-transplant OGTT (yes), age, gender, ethnicity, donor type, previous transplants (yes), time on dialysis, HLA-1 mismatch, BMI pre- and post-transplant, GFR, phosphate, ionized calcium, PTH, urea, haemoglobin, prednisolone dose, furosemide (yes), beta blocker (yes) and missing  $\geq 1$  observation (yes). Statistical analyses were first performed using complete data, then repeated on each imputed data set, and finally pooled to achieve single parameter estimates.

#### Statistical analysis

Data are reported as mean (SD), median (interquartile range, IQR) or frequencies (%). Groups were compared using independent samples *t*-test, Mann–Whitney or  $\chi^2$  test, with Fisher's exact test for sparse  $2 \times 2$  tables (expected cell frequency  $< 5$ ). Continuous variables were compared using

**Table 1.** Comparison of subjects with zero vs.  $\geq 1$  missing observation<sup>a</sup>

|                                                       | Complete ( <i>n</i> = 217) |   | $\geq 1$ missing ( <i>n</i> = 84) <sup>b</sup> |    | <i>P</i> |
|-------------------------------------------------------|----------------------------|---|------------------------------------------------|----|----------|
|                                                       |                            | # |                                                | #  |          |
| <i>Patient characteristics</i>                        |                            |   |                                                |    |          |
| Age (years)                                           | 50.9 (14.6)                | 0 | 50.5 (14.4)                                    | 0  | 0.850    |
| Female gender (yes)                                   | 72 (33%)                   | 0 | 35 (42%)                                       | 0  | 0.168    |
| Non-Caucasian ethnicity (yes)                         | 8 (4%)                     | 0 | 5 (6%)                                         | 0  | 0.362    |
| Pre-transplant BMI (kg/m <sup>2</sup> ) <sup>c</sup>  | 25.4 (4.0)                 | 0 | 24.5 (4.1)                                     | 27 | 0.119    |
| Post-transplant BMI (kg/m <sup>2</sup> ) <sup>c</sup> | 24.9 (3.8)                 | 0 | 23.9 (3.5)                                     | 6  | 0.047    |
| Previous renal transplants (yes)                      | 23 (11%)                   | 0 | 21 (25%)                                       | 0  | 0.002    |
| Time since transplantation (days)                     | 71 (8)                     | 0 | 71 (10)                                        | 0  | 0.695    |
| Time on dialysis (weeks)                              | 40 (7–78)                  | 0 | 42 (0–83)                                      | 0  | 0.861    |
| Living donor (yes)                                    | 99 (46%)                   | 0 | 28 (33%)                                       | 0  | 0.053    |
| $\geq 3$ HLA class 1 mismatches (yes)                 | 71 (33%)                   | 0 | 32 (38%)                                       | 0  | 0.378    |
| $\geq 1$ HLA class 2 mismatches (yes)                 | 132 (61%)                  | 0 | 46 (51%)                                       | 0  | 0.337    |
| Cold ischaemic time (h)                               | 6 (3–14)                   | 0 | 10 (4–15)                                      | 0  | 0.125    |
| Acute rejection <10 weeks (yes)                       | 77 (36%)                   | 0 | 30 (36%)                                       | 0  | 0.970    |
| <i>Medication at 10 weeks post-transplant</i>         |                            |   |                                                |    |          |
| Prednisolone (mg/kg/day)                              | 0.16 (0.13–0.21)           | 0 | 0.17 (0.13–0.23)                               | 0  | 0.274    |
| CSD (mg/kg)                                           | 20.8 (17.3–40.9)           | 0 | 25.2 (17.6–44.4)                               | 0  | 0.267    |
| Cyclosporine A (yes)                                  | 175 (81%)                  | 0 | 65 (77%)                                       | 0  | 0.527    |
| Tacrolimus (yes)                                      | 31 (14%)                   | 0 | 18 (21%)                                       | 0  | 0.132    |
| Furosemide (yes)                                      | 76 (35%)                   | 0 | 32 (38%)                                       | 7  | 0.618    |
| Beta blocker (yes)                                    | 110 (51%)                  | 0 | 45 (54%)                                       | 5  | 0.654    |
| <i>Pre-transplant laboratory results</i>              |                            |   |                                                |    |          |
| Pre-transplant FPG (mmol/L)                           | 5.0 (4.6–5.4)              | 0 | 4.9 (4.5–5.4)                                  | 24 | 0.503    |
| Pre-transplant 2h-PG (mmol/L)                         | 6.6 (5.4–8.3)              | 0 | 6.4 (5.1–7.9)                                  | 62 | 0.222    |
| <i>Post-transplant laboratory results</i>             |                            |   |                                                |    |          |
| Phosphate (mmol/L)                                    | 0.84 (0.18)                | 0 | 0.88 (0.26)                                    | 0  | 0.218    |
| iCa (mmol/L)                                          | 1.33 (0.09)                | 0 | 1.34 (0.08)                                    | 9  | 0.544    |
| PTH (pmol/L)                                          | 11.1 (7.6–16.6)            | 0 | 10.4 (7.8–15.4)                                | 7  | 0.697    |
| Urea (mmol/L)                                         | 9.6 (3.4)                  | 0 | 10.9 (6.7)                                     | 0  | 0.078    |
| Creatinine ( $\mu$ mol/L)                             | 124 (36)                   | 0 | 123 (48)                                       | 0  | 0.803    |
| GFR (ml/min/1.73 m <sup>2</sup> )                     | 54 (14)                    | 0 | 54 (16)                                        | 12 | 0.813    |
| Haemoglobin (g/dL)                                    | 11.8 (1.5)                 | 0 | 11.8 (1.5)                                     | 0  | 0.796    |
| FPG (mmol/L) <sup>d</sup>                             | 4.5 (3.9–4.9)              | 0 | 4.5 (3.9–4.9)                                  | 0  | 0.993    |
| 2h-PG (mmol/L) <sup>d</sup>                           | 5.2 (4.1–6.8)              | 0 | 5.2 (4.3–6.6)                                  | 0  | 0.877    |
| PHYG (yes)                                            | 64 (31%)                   | 0 | 29 (35%)                                       | 0  | 0.397    |

<sup>a</sup>Mean (SD), median (interquartile range) or frequencies (%), with comparisons by independent samples *t*-test, Mann–Whitney or  $\chi^2$  test as appropriate.

<sup>b</sup>Pooled results for all 84 subjects, i.e. after imputation of missing observations whenever present.

#, number of missing observations imputed prior to pooling.

iCa, ionized calcium; CSD, cumulative steroid dose; FPG, fasting plasma glucose; 2h-PG, 2-h post-challenge plasma glucose.

parametric (Pearson's *r*) or non-parametric correlations (Spearman's Rho) and repeated measurements using paired samples or Wilcoxon signed rank test.

The outcome (PHYG) was assessed using simple multiple logistic regression, followed by backward and forward stepwise regressions to confirm results using  $-2$  log likelihood (LL) cut-offs of  $P < 0.20$  and  $>0.25$  for entry and removal, respectively. Explanatory variables [age, gender, ethnicity, donor type, previous transplants, BMI, prednisolone, GFR, urea, PTH, phosphate, iCa and pre-transplant glucose (FPG or 2h-PG)] were included a priori. Four additional variables were included as confounders for donor type (time on dialysis, HLA mismatch), age and laboratory results (beta blocker, furosemide). This produced  $>5$  events per variable (EPV), which has been shown to produce similar results as compared to the commonly employed but probably overly strict 10 EPV rule of thumb [20]. Urea and pre-transplant 2h-PG displayed near-linear increments in the log odds of PHYG with increasing categories (Figures 2A and B) and were included as continuous covariates; other continuous variables were categorized for logistic analyses (Table 2). The lowest categories (tertile 1) were used as reference. Model fit was confirmed in all models (Hosmer–Lemeshow test  $P > 0.2$ ). Multicollinearity ( $r$  or Rho  $> 0.7$ ) was observed [cold ischaemic time (donor type); acute rejection (cu-

mulative glucocorticoid dose); GFR (plasma creatinine); all  $r$  or Rho  $> 0.7$ ] but not among included variables. Models with and without glucose measurements were compared using the LL method. Two-tailed  $P < 0.05$  was considered statistically significant. Analyses were implemented using SPSS 17.0 (SPSS, Chicago, IL).

## Results

Multiple imputation (MI,  $n = 301$ ) allowed for inclusion of 84 subjects who would have been lost in complete case (CC,  $n = 217$ ) analysis. Subjects with zero vs.  $\geq 1$  missing observation are compared in Table 1. Table 2 displays the categories of continuous variables used in logistic regression. With two notable exceptions (null effect relating to age and ethnicity in CC analysis), CC and MI data produced similar overall results. For the purpose of clarity, only MI results are presented; CC results are available in the online Appendix.

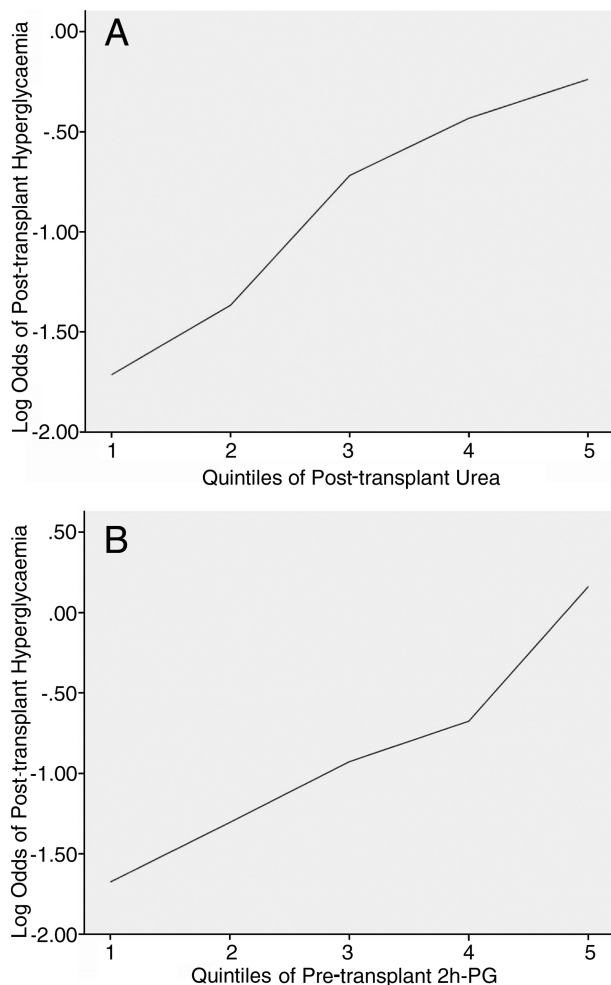

**Fig. 2.** Assumption of linearity. The use of continuous covariates in logistic regression assumes that the log odds of the outcome progresses linearly across categories of a continuous covariate. Only urea and pre-transplant 2-h plasma glucose (2h-PG) met this assumption. The figures show the approximately linear increase in the log odds of post-transplant hyperglycaemia across categories (quintiles) of urea (A) or pre-transplant 2h-PG (B).

Patient characteristics and drug use are presented in Tables 3 and 4. PHYG was observed in 93 patients (31%; two IFG, 52 IGT, 39 DM). Twenty of 39 patients with DM (51%) were diagnosed prior to 10 weeks and did not undertake the post-transplant OGTT. Among the other 73 patients diagnosed with PHYG at 10 weeks, only 11 patients (15%) were diagnosed using fasting glucose alone (nine DM, two IFG); the remaining proportion [ $n = 62$  (85%); 52 IGT, 10 DM] was diagnosed by the 2-h glucose. Compared to NGM patients, PHYG patients were older, had longer pre-transplant dialysis times, fewer living donations, longer cold ischaemic times and poorer HLA class 1 matching and received higher glucocorticoid doses. BMI dropped between the pre- and post-transplant recording in both PHYG and NGM patients (both  $P = 0.002$ ); the magnitude of the BMI reduction was similar (0.8 vs. 0.4 kg/m<sup>2</sup>,  $P = 0.203$ ).

Patients diagnosed with PHYG had higher glucose levels pre-transplant compared to patients with NGM (Table 5). A 1-mmol/L increment in pre-transplant FPG and 2h-PG, respectively, predicted a 122% and 27% increase in the risk of PHYG [crude OR 2.22 (95% CI 1.46–3.39) and 1.27 (95% CI 1.12–1.44)]. Pre-transplant glycaemia correlated with post-transplant glucose and urea levels but not with other post-transplant laboratory results and was comparable whether patients were pre-dialytic (62%) or not at the time of investigation (FPG 5.0 vs. 4.9,  $P = 0.194$ ; 2h-PG 6.6 vs. 6.7 mmol/L;  $P = 0.430$ ). In patients with PHYG, FPG and 2h-PG were significantly higher post- as compared to pre-transplant. In NGM patients, the opposite result was observed for both parameters (all  $P < 0.001$ ) (Table 5).

PHYG patients had higher post-transplant levels of urea compared to NGM patients, while PTH, phosphate, ionized calcium, creatinine, GFR and haemoglobin (Hb) were similar (Table 5). A 1-mmol/L increment in plasma urea conferred a 14% increase in the crude risk of PHYG [crude OR 1.14 (95% CI 1.07–1.21)]. A similar result was observed in each category of GFR [OR 1.17 (1.05–1.31), 1.19 (1.03–1.37) and 1.35 (1.06–1.71), tertile 1–3, respectively]. Urea levels correlated with pre-transplant FPG,

**Table 2.** Tertiles of continuous variables<sup>a</sup>

|                                                       | Tertile 1 |             |          | Tertile 2 |             |          | Tertile 3 |              |          | Total    |             |          |
|-------------------------------------------------------|-----------|-------------|----------|-----------|-------------|----------|-----------|--------------|----------|----------|-------------|----------|
|                                                       | <i>M</i>  | Range       | <i>n</i> | <i>M</i>  | Range       | <i>n</i> | <i>M</i>  | Range        | <i>n</i> | <i>M</i> | Range       | <i>n</i> |
| Age at transplant (years) <sup>b</sup>                | 34.0      | (18.1–45.2) | 102      | 52.0      | (45.5–58.3) | 98       | 66.5      | (58.3–78.8)  | 101      | 50.8     | (18.1–78.8) | 301      |
| BMI post-transplant (kg/m <sup>2</sup> ) <sup>b</sup> | 20.8      | (16.3–22.6) | 100      | 24.3      | (22.8–25.9) | 101      | 28.7      | (25.9–38.7)  | 100      | 28.7     | (16.3–38.7) | 301      |
| Time on dialysis (weeks) <sup>c</sup>                 | 0         | (0–0)       | 74       | 33        | (3–60)      | 116      | 94        | (61–696)     | 111      | 58       | (0–696)     | 301      |
| Prednisolone (mg/kg) <sup>c</sup>                     | 0.13      | (0.09–0.14) | 101      | 0.16      | (0.15–0.20) | 100      | 0.25      | (0.21–0.68)  | 100      | 0.16     | (0.09–0.68) | 301      |
| GFR (ml/min/1.73 m <sup>2</sup> ) <sup>b</sup>        | 39        | (8–47)      | 103      | 54        | (48–60)     | 100      | 70        | (61–108)     | 98       | 54       | (8–108)     | 301      |
| iCa (mmol/L) <sup>b</sup>                             | 1.24      | (1.04–1.29) | 94       | 1.32      | (1.30–1.35) | 97       | 1.42      | (1.36–1.70)  | 110      | 1.33     | (1.04–1.70) | 301      |
| Phosphate (mmol/L) <sup>b,d</sup>                     | 0.7       | (0.3–0.8)   | 159      | 0.9       | (0.9–0.9)   | 64       | 1.1       | (1.0–2.4)    | 78       | 0.9      | (0.3–2.4)   | 301      |
| PTH (pmol/L) <sup>c</sup>                             | 6.5       | (1.1–8.4)   | 100      | 10.9      | (8.4–14.5)  | 101      | 18.7      | (14.6–155.7) | 100      | 10.9     | (1.1–155.7) | 301      |

<sup>a</sup>Within each tertile, *M* represents either the mean or the median value. Range indicates the highest and lowest value in each tertile. Prednisolone dose and laboratory values assessed at 10 weeks post-transplant.

<sup>b</sup>*M* represents mean.

<sup>c</sup>*M* represents median.

<sup>d</sup>Phosphate tertiles are skewed due to a large number of identical phosphate concentrations contained in the lower tertile.

iCa, ionized calcium.

**Table 3.** Patient characteristics<sup>a</sup>

|                                                       | All ( <i>n</i> = 301) | NGM ( <i>n</i> = 208) | PHYG ( <i>n</i> = 93) | <i>P</i> <sup>b</sup> |
|-------------------------------------------------------|-----------------------|-----------------------|-----------------------|-----------------------|
| Age (years)                                           | 50.8 (14.5)           | 49.3 (13.8)           | 54.2 (15.6)           | 0.007                 |
| Female gender (yes)                                   | 107 (36%)             | 75 (36%)              | 32 (34%)              | 0.782                 |
| Non-Caucasian ethnicity (yes)                         | 13 (4%)               | 5 (2%)                | 8 (9%)                | 0.027                 |
| Pre-transplant BMI (kg/m <sup>2</sup> ) <sup>c</sup>  | 25.1 (4.0)            | 24.9 (3.9)            | 25.6 (4.4)            | 0.185                 |
| Post-transplant BMI (kg/m <sup>2</sup> ) <sup>c</sup> | 24.6 (3.7)            | 24.5 (3.5)            | 24.8 (4.1)            | 0.518                 |
| Previous renal transplants (yes)                      | 44 (15%)              | 26 (13%)              | 18 (19%)              | 0.120                 |
| Time since transplantation (days)                     | 71 (9)                | 72 (9)                | 71 (8)                | 0.403                 |
| Time on dialysis pre-transplant (weeks)               | 41 (4–81)             | 34 (0–72)             | 50 (21–94)            | 0.006                 |
| Living donor (yes)                                    | 127 (42%)             | 98 (47%)              | 29 (31%)              | 0.010                 |
| ≥3 HLA class 1 mismatches (yes)                       | 103 (34%)             | 63 (30%)              | 40 (43%)              | 0.032                 |
| ≥1 HLA class 2 mismatches (yes)                       | 178 (59%)             | 123 (59%)             | 55 (59%)              | 0.999                 |
| Cold ischaemic time (h)                               | 7 (3–15)              | 6 (3–14)              | 11 (4–16)             | 0.046                 |
| Acute rejection <10 weeks (yes)                       | 107 (36%)             | 63 (30%)              | 44 (47%)              | 0.004                 |

<sup>a</sup>Mean (SD), median (interquartile range) or frequencies. Pooled mean with mean standard deviations are given for data containing imputed values.

<sup>b</sup>PHYG vs. NGM by independent samples *t*-test, Mann–Whitney or  $\chi^2$  test as appropriate.

<sup>c</sup>Pre- to post-transplant BMI dropped significantly in both groups (*P* = 0.002 by paired samples *t*-test).

NGM, normal glucose metabolism; PHYG, post-transplant hyperglycaemia.

post-transplant 2h-PG, age, male gender, the occurrence of acute rejections or presence of ≥3 HLA class 1 mismatches, plasma phosphate, prednisolone dose (mg/kg), beta blocker or furosemide use and the time spent on dialysis pre-transplant (all *P* < 0.05). An inverse correlation was observed between urea and GFR (*r* = −0.59), albumin and Hb (all *P* ≤ 0.001).

Crude results were adjusted by multiple regression as shown in Table 6. Results of stepwise procedures were almost identical to those presented (not shown). A 1-mmol/L increment in pre-transplant 2h-PG predicted a PHYG risk increase of 26% (adjusted OR 1.26, 95% CI 1.09–1.46). A similar result was achieved using FPG rather than 2h-PG (adjusted OR 2.20, 95% CI 1.29–3.75). As in univariable analysis, a 1-mmol/L increment in urea was associated with a 14% increment in the risk of PHYG (adjusted OR 1.14, 95% CI 1.02–1.27).

The inclusion of either FPG or 2h-PG each increased the discriminative ability of the model as compared to omitting pre-transplant glucose entirely [Nagelkerke *R*<sup>2</sup> 0.30, 0.32 and 0.26 for FPG, 2h-PG and omission of glucose, respectively; LL statistic 8.80 (*P* = 0.003) and 16.26 (*P* < 0.001) for FPG or 2h-PG, each compared to omission]. Addition of 2h-PG to a model already containing FPG significantly improved the model (*R*<sup>2</sup> increased from 0.30 to 0.33; LL

statistic 11.60, *P* < 0.001), while adding FPG to a model already containing 2h-PG did not, statistically, add significant information (*R*<sup>2</sup> increased from 0.32 to 0.33; LL statistic 3.39, *P* = 0.066). Pre-transplant 2h-PG was therefore more strongly associated with PHYG than was pre-transplant FPG.

In addition to pre-transplant glycaemia and high post-transplant urea levels, older age, non-Caucasian ethnicity, previous transplants, ≥3 HLA class 1 mismatches and high prednisolone doses were associated with a higher risk of PHYG. No significant associations were observed between PHYG and PTH, phosphate or iCa, and no significant impact of gender or BMI could be demonstrated. Patients with PHYG had a slightly elevated GFR compared to NGM patients having the same age and urea level (difference of 3 ml/min/1.73 m<sup>2</sup>, result not shown). A missing data variable (MI performed = yes) was created in each MI data set to test whether results were confounded by the imputation itself. This variable was statistically insignificant (*P* = 0.832), left other results unaltered and was discarded.

## Discussion

The main findings of this study were the direct associations between pre- and post-transplant glycaemia and also

**Table 4.** Medication at 10 weeks after transplantation<sup>a</sup>

|                          | All ( <i>n</i> = 301) | NGM ( <i>n</i> = 208) | PHYG ( <i>n</i> = 93) | <i>P</i> <sup>b</sup> |
|--------------------------|-----------------------|-----------------------|-----------------------|-----------------------|
| Prednisolone (mg/kg/day) | 0.16 (0.13–0.21)      | 0.16 (0.13–0.20)      | 0.20 (0.13–0.28)      | 0.003                 |
| CSD (mg/kg)              | 21.6 (17.4–42.8)      | 21.0 (17.2–38.2)      | 26.4 (17–47.8)        | 0.037                 |
| Cyclosporine A (yes)     | 240 (80%)             | 166 (80%)             | 74 (80%)              | 0.962                 |
| Tacrolimus (yes)         | 49 (16%)              | 33 (16%)              | 16 (17%)              | 0.771                 |
| Furosemide (yes)         | 108 (36%)             | 63 (30%)              | 45 (48%)              | 0.003                 |
| Beta blocker (yes)       | 155 (51%)             | 97 (47%)              | 58 (62%)              | 0.011                 |

<sup>a</sup>Median (interquartile range) or frequencies.

<sup>b</sup>PHYG vs. NGM by Mann–Whitney or  $\chi^2$  test as appropriate.

CSD, cumulative steroid dose; NGM, normal glucose metabolism; PHYG, post-transplant hyperglycaemia.

**Table 5.** Laboratory results<sup>a</sup>

|                                             | All ( <i>n</i> = 301)       | NGM ( <i>n</i> = 208)        | PHYG ( <i>n</i> = 93)         | <i>P</i> <sup>b</sup> |
|---------------------------------------------|-----------------------------|------------------------------|-------------------------------|-----------------------|
| <i>10 weeks after renal transplantation</i> |                             |                              |                               |                       |
| Phosphate (mmol/L)                          | 0.8 (0.20)                  | 0.8 (0.18)                   | 0.9 (0.24)                    | 0.059                 |
| iCa (mmol/L)                                | 1.33 (0.09)                 | 1.34 (0.09)                  | 1.33 (0.10)                   | 0.463                 |
| PTH (pmol/L)                                | 10.9 (7.7–16.2)             | 10.9 (7.7–15.4)              | 10.8 (7.6–17.3)               | 0.849                 |
| Urea (mmol/L)                               | 9.9 (4.6)                   | 9.2 (3.4)                    | 11.7 (6.2)                    | <0.001                |
| Creatinine (μmol/L)                         | 124 (40)                    | 122 (36)                     | 126 (47)                      | 0.447                 |
| GFR (ml/min/1.73 m <sup>2</sup> )           | 54 (15)                     | 54 (15)                      | 53 (15)                       | 0.478                 |
| Haemoglobin (g/dL)                          | 11.8 (1.5)                  | 11.8 (1.5)                   | 11.8 (1.5)                    | 0.948                 |
| FPG (mmol/L) <sup>c</sup>                   | 5.0 (4.3–5.4)               | 4.8 (4.2–5.1) <sup>d**</sup> | 5.8 (5.2–6.3) <sup>e**</sup>  | <0.001 <sup>c</sup>   |
| 2h-PG (mmol/L) <sup>c</sup>                 | 5.8 (4.7–7.4) <sup>d*</sup> | 5.2 (4.4–6.0) <sup>d**</sup> | 8.8 (8.0–10.7) <sup>e**</sup> | <0.001 <sup>c</sup>   |
| <i>Before transplantation</i>               |                             |                              |                               |                       |
| FPG (mmol/L)                                | 5.0 (4.6–5.4)               | 4.9 (4.5–5.3)                | 5.2 (4.9–5.6)                 | <0.001                |
| 2h-PG (mmol/L)                              | 6.5 (5.3–8.2)               | 6.2 (5.1–7.5)                | 7.4 (6.0–9.0)                 | <0.001                |

<sup>a</sup>Mean (SD) or median (interquartile range). For normally distributed data containing imputed values, pooled means and mean standard deviations are reported. For data with non-normal distribution containing imputed values, medians and interquartile ranges represent the medians among imputed datasets.

<sup>b</sup>PHYG vs. NGM by independent samples *t*-test or Mann–Whitney *U*-test as appropriate.

<sup>c</sup>*n* = 281; oral glucose challenge was not performed in 20 patients who had been diagnosed with diabetes mellitus <10 weeks post-transplant. Their post-transplant glucose levels were not missing at random and therefore not imputed. Plasma values are reported as achieved through multiplication of the original whole blood measurements by a factor of 1.11 [17].

<sup>d</sup>Significant decrease compared to the corresponding pre-transplant result (\**P* < 0.005 or \*\**P* < 0.001 by Wilcoxon signed rank test).

<sup>e</sup>Significant increase compared to the corresponding pre-transplant result (\**P* < 0.005 or \*\**P* < 0.001 by Wilcoxon signed rank test).

iCa, ionized calcium; FPG, fasting plasma glucose; NGM, normal glucose metabolism; PHYG, post-transplant hyperglycaemia; 2h-PG, 2 h post-challenge plasma glucose.

the association between post-transplant urea levels and PHYG. These relationships appeared to be continuous and independent of GFR, glucocorticoids and other well-known confounders. There were no similar associations for PTH, phosphate or calcium. In line with previous observations [1–4], older age, non-Caucasian ethnicity and high glucocorticoid doses were also independently associated with PHYG.

Post-transplant hyperglycaemia probably develops as a combined result of pre-existing and transplant-related fac-

tors. A pre-existing disposition for hyperglycaemia is not necessarily evident before surgery, since insulin clearance is impaired and the requirement for insulin accordingly reduced in CKD. Mild cases of pre-existing hyperglycaemia can remain undetected until insulin requirements rebound post-transplant, preventing predisposed individuals from being identified ahead of transplant unless specifically tested. Impairments in pre-transplant insulin sensitivity [21], and also insulin secretion [22,23], have been reported in patients who later developed PHYG. Our findings fall in line with these reports but, to the best of our knowledge, have not been reported in a Caucasian RTx population of the current size. The results extend previous findings by indicating that PHYG may be more effectively predicted through pre-transplant evaluation of 2h-PG rather than FPG. This supports the use of the OGTT in the pre-transplant setting, as is increasingly advocated [24]. It remains to be studied what discrete levels of pre-transplant glycaemia predict PHYG and whether PHYG can be prevented by interventions among patients awaiting transplantation.

Despite their steroid use and other transplant-related factors, NGM patients displayed a reduction in FPG and 2h-PG from pre- to post-transplant measurements. This may have been related to the lowering of BMI, although the reduction in BMI did not correlate with reductions in FPG [Rho 0.085 (NGM) and –0.142 (PHYG)] or 2h-PG [0.065 (NGM) and 0.008 (PHYG); all *P* > 0.235]. Whether RTx can improve glucose metabolism in selected patients, possibly by attenuating uraemia, is an intriguing question that demands further studies.

Renal transplantation alleviates the accumulation of urea by improving renal elimination. At the same time, transplantation is accompanied by processes that promote urea appearance. The observed results suggest that PHYG was

**Table 6.** Multiple regression vs. post-transplant hyperglycaemia

|                                          | OR <sup>a</sup> | (95% CI) <sup>a</sup> | <i>P</i> <sup>b</sup> |
|------------------------------------------|-----------------|-----------------------|-----------------------|
| Age (tertiles)                           | 2.40            | (1.02, 5.65)          | 0.047                 |
| Male gender (yes)                        | 0.69            | (0.35, 1.37)          | 0.536                 |
| Non-Caucasian (yes)                      | 4.44            | (1.08, 18.3)          | 0.021                 |
| BMI (tertiles)                           | 1.31            | (0.58, 2.95)          | 0.419                 |
| Previous transplants (yes)               | 2.42            | (1.04, 5.64)          | 0.030                 |
| Time on dialysis (tertiles) <sup>c</sup> | 1.88            | (0.77, 4.56)          | 0.169                 |
| Living donor (yes)                       | 0.91            | (0.45, 1.83)          | 0.999                 |
| ≥3 HLA-1 mismatches (yes)                | 2.24            | (1.17, 4.28)          | 0.031                 |
| Use of furosemide (yes)                  | 1.42            | (0.70, 2.88)          | 0.318                 |
| Use of beta blocker (yes)                | 1.72            | (0.89, 3.30)          | 0.130                 |
| Prednisolone (tertiles)                  | 2.65            | (1.16, 6.05)          | 0.009                 |
| Urea (mmol/L)                            | 1.14            | (1.02, 1.27)          | 0.014                 |
| GFR (tertiles)                           | 3.07            | (1.20, 7.85)          | 0.012                 |
| iCa (tertiles)                           | 1.43            | (0.66, 3.10)          | 0.391                 |
| Phosphate (tertiles)                     | 1.56            | (0.71, 3.40)          | 0.278                 |
| PTH (tertiles)                           | 0.73            | (0.34, 1.59)          | 0.464                 |
| Pre-transplant 2h-PG (mmol/L)            | 1.26            | (1.09, 1.46)          | 0.001                 |

<sup>a</sup>Categorized continuous variables: OR for the highest vs. lowest tertile (reference).

<sup>b</sup>Linear trend across categories.

<sup>c</sup>Pre-emptive transplantation is reference tertile.

indirectly related to mechanisms either impairing urea elimination or promoting urea appearance or possibly directly related to the actual plasma urea levels. In support of mechanisms not related to urea elimination, PHYG was associated with increments in urea across each category of GFR.

Endogenous protein catabolism is the main contributor to the appearance of urea and is also associated with insulin resistance in CKD and haemodialysis patients [25, 26]. On the one hand, transplant-related catabolic processes, promoted by surgery, glucocorticoids and chronic inflammation, may thus lead to PHYG by compromising insulin sensitivity. We adjusted for glucocorticoids but had no specific data to reflect protein turnover or inflammation. On the other hand, protein breakdown may also be secondary to insulin resistance, rather than strictly vice versa [26], and we observed a crude association between pre-transplant FPG and post-transplant urea levels. Markers of insulin sensitivity, such as the homeostasis model assessment (HOMA) index, may increase our understanding of the interplay between glucose and protein metabolism and should be considered in future studies on this topic in transplant patients. Gastrointestinal bleeding increases urea levels but is unlikely to have contributed significantly to PHYG in our study, since Hb was similar in NGM and PHYG patients.

There are several indications that urea may interfere directly with glucose metabolism. First, dialysis temporarily normalizes glucose tolerance, suggesting that uraemic hyperglycaemia involves a dialyzable solute [27–30]. Second, urea levels have been found to correlate with insulin resistance in CKD patients [31] and are lowered by low-protein diets, which have insulin-sensitizing effects in terminal uraemia [32]. Third, oral urea loading has been reported to reduce glucose disposal in healthy males [33] and stable CKD patients [34]. In apparent contrast, dialysis against a high urea gradient does not seem to yield any evident glycaemic changes [28,35]. It is conceivable, however, that glycaemic effects of high urea levels were diluted by dialysis itself in these reports, whereby the removal of alternative diabetogenic solutes was comparatively unaffected. Such solutes could include dialyzable by-products of urea generated through carbamylation, such as carbamylated amino acids [36].

Plasma calcium, phosphate and PTH were not associated with PHYG in our study. Even if they correlate with insulin metabolism in the absence of renal failure [37–41], the role of calcium and phosphate may be confounded by internal phosphate redistribution [42] or persistently altered vitamin D or fibroblast growth factor 23 levels after RTx [43]. Parathyroidectomy has led to increased [13], unchanged [12] or even reduced [29] insulin secretion, and the insignificant role of PTH in our study falls in line with these inconsistencies.

The present study has certain limitations. First, since regression models are sensitive to correlations between explanatory variables, results relating urea to PHYG may have been affected by residual confounding due to GFR. Nonetheless, we considered it mandatory to adjust for GFR due to its key role as confounder. Univariable and confirmatory regressions yielded urea a significant contributor, regardless of whether GFR was entered into the

model or not (not shown), and the PHYG risk associated with increments in urea was significantly higher than null in each category of GFR. Second, missing data were present for 28% of patients. However, MI serves to maintain power and lower the risk of bias and is the preferred method of handling missing data when their prevalence exceeds 10% [44]. Our MI results retained all significant contributors from CC analysis and also revealed associations with PHYG for age and ethnicity, two well-established risk factors. By rendering these important factors insignificant, CC results are likely to have been biased as compared to our MI results. Third, information on diet or family history of DM was unavailable. However, high protein intake can either improve or worsen glycaemia, respectively, depending on whether renal function is normal [45] or terminally impaired [32]. The role of a family history of DM can also be questioned, due to information bias [46]. Finally, PTH, phosphate and calcium levels do not stabilize as swiftly as does the renal function post-transplant, and interpretation of their plasma levels requires caution.

In conclusion, elevated pre-transplant glycaemia and post-transplant urea levels were independently associated with PHYG in the early post-transplant period. These results were independent of GFR, PTH, phosphate and calcium. It remains to be determined which cut-off points of pre-transplant glycaemia best describe the risk of PHYG and whether PHYG is associated with the elimination, appearance or actual plasma levels of urea.

*Acknowledgements.* This project was financed by grants from the Norwegian Foundation for Health and Rehabilitation.

*Conflict of interest statement.* The results presented in this paper have not been published previously in whole or part, except in abstract format.

## References

- Davidson J, Wilkinson A, Dantal J *et al.* New-onset diabetes after transplantation: 2003 International Consensus Guidelines—Proceedings of an International Expert Panel Meeting Barcelona, Spain 19 February 2003. *Transplantation* 2003; 75: SS3–SS24
- Hjeltneseth J, Hartmann A, Kofstad J *et al.* Glucose intolerance after renal transplantation depends upon prednisolone dose and recipient age. *Transplantation* 1997; 64: 979–983
- Hur KY, Kim MS, Kim YS *et al.* Risk factors associated with the onset and progression of posttransplantation diabetes in renal allograft recipients. *Diabetes Care* 2007; 30: 609–615
- Midtvedt K, Hjeltneseth J, Hartmann A *et al.* Insulin resistance after renal transplantation: the effect of steroid dose reduction and withdrawal. *J Am Soc Nephrol* 2004; 15: 3233–3239
- DECODE Study Group. Is the current definition for diabetes relevant to mortality risk from all causes and cardiovascular and noncardiovascular diseases?. *Diabetes Care* 2003; 26: 688–696
- Brunner EJ, Shipley MJ, Witte DR *et al.* Relation between blood glucose and coronary mortality over 33 years in the Whitehall Study. *Diabetes Care* 2006; 29: 26–31
- Leviton EB, Song Y, Ford ES *et al.* Is nondiabetic hyperglycemia a risk factor for cardiovascular disease? A meta-analysis of prospective studies. *Arch Int Med* 2004; 164: 2147–2155
- Cosio FG, Kudva Y, van der Velde M *et al.* New onset hyperglycemia and diabetes are associated with increased cardiovascular risk after kidney transplantation. *Kidney Int* 2005; 67: 2415–2421

9. Tutone VK, Mark PB, Revanur V *et al.* Random blood glucose measurements and survival in nondiabetic renal transplant recipients. *Transplant Proc* 2004; 36: 3006–3011
10. Sharif A, Moore R, Baboolal K. Influence of lifestyle modification in renal transplant recipients with postprandial hyperglycemia. *Transplantation* 2008; 85: 353–358
11. DeFronzo RA, Alvestrand A, Smith D *et al.* Insulin resistance in uremia. *J Clin Invest* 1981; 67: 563–568
12. Amend WJ Jr, Steinberg SM, Lowrie EG *et al.* The influence of serum calcium and parathyroid hormone upon glucose metabolism in uremia. *J Lab Clin Med* 1975; 86: 435–444
13. Mak RH, Bettinelli A, Turner C *et al.* The influence of hyperparathyroidism on glucose metabolism in uremia. *J Clin Endocrinol Metab* 1985; 60: 229–233
14. Rigalleau V, Gin H. Carbohydrate metabolism in uraemia. *Curr Opin Clin Nutr Metab Care* 2005; 8: 463–469
15. Definition, diagnosis and classification of diabetes mellitus and its complications: report of a WHO consultation. *Part 1: Diagnosis and Classification of Diabetes Mellitus* 1999 Geneva World Health Organization
16. Vartdal F, Gaudernack G, Funderud S *et al.* HLA class I and II typing using cells positively selected from blood by immunomagnetic isolation—a fast and reliable technique. *Tissue Antigens* 1986; 28: 301–312
17. D'Orazio P, Burnett RW, Fogh-Andersen N *et al.* Approved IFCC recommendation on reporting results for blood glucose (abbreviated). *Clin Chem* 2005; 51: 1573–1576
18. Buttgerit F, Brand MD, Burmester GR. Equivalent doses and relative drug potencies for non-genomic glucocorticoid effects: a novel glucocorticoid hierarchy. *Biochem Pharmacol* 1999; 58: 363–368
19. Horton NJ, Kleinman KP. Much ado about nothing: a comparison of missing data methods and software to fit incomplete data regression models. *Am Stat* 2007; 61: 79–90
20. Vittinghoff E, McCulloch CE. Relaxing the rule of ten events per variable in logistic and Cox regression. *Am J Epidemiol* 2007; 165: 710–718
21. Bayes B, Lauzurica R, Granada ML *et al.* Adiponectin and risk of new-onset diabetes mellitus after kidney transplantation. *Transplantation* 2004; 78: 26–30
22. Nam JH, Mun JI, Kim SI *et al.* Beta-cell dysfunction rather than insulin resistance is the main contributing factor for the development of postrenal transplantation diabetes mellitus. *Transplantation* 2001; 71: 1417–1423
23. Sato T, Inagaki A, Uchida K *et al.* Diabetes mellitus after transplant: relationship to pretransplant glucose metabolism and tacrolimus or cyclosporine A-based therapy. *Transplantation* 2003; 76: 1320–1326
24. Wilkinson A, Davidson J, Dotta F *et al.* Guidelines for the treatment and management of new-onset diabetes after transplantation. *Clin Transplant* 2005; 19: 291–298
25. Lee SW, Park GH, Lee SW *et al.* Insulin resistance and muscle wasting in non-diabetic end-stage renal disease patients. *Nephrol Dial Transplant* 2007; 22: 2554–2562
26. Siew ED, Pupim LB, Majchrzak KM *et al.* Insulin resistance is associated with skeletal muscle protein breakdown in non-diabetic chronic hemodialysis patients. *Kidney Int* 2007; 71: 146–152
27. DeFronzo RA, Tobin JD, Rowe JW *et al.* Glucose intolerance in uremia. Quantification of pancreatic beta cell sensitivity to glucose and tissue sensitivity to insulin. *J Clin Invest* 1978; 62: 425–435
28. Hampers CL, Soeldner JS, Doak PB *et al.* Effect of chronic renal failure and hemodialysis on carbohydrate metabolism. *J Clin Invest* 1966; 45: 1719–1731
29. Lindall A, Carmena R, Cohen S *et al.* Insulin hypersecretion in patients on chronic hemodialysis. Role of parathyroids. *J Clin Endocrinol Metab* 1971; 32: 653–658
30. McCaleb ML, Izzo MS, Lockwood DH. Characterization and partial purification of a factor from uremic human serum that induces insulin resistance. *J Clin Invest* 1985; 75: 391–396
31. Kobayashi S, Maesato K, Moriya H *et al.* Insulin resistance in patients with chronic kidney disease. *Am J Kidney Dis* 2005; 45: 275–280
32. Rigalleau V, Blanchetier V, Combe C *et al.* A low-protein diet improves insulin sensitivity of endogenous glucose production in predialytic uremic patients. *Am J Clin Nutr* 1997; 65: 1512–1516
33. Perkoff GT, Thomas CL, Newton JD *et al.* Mechanism of impaired glucose tolerance in uremia and experimental hyperazotemia. *Diabetes* 1958; 7: 375–383
34. Balestri PL, Rindi P, Biagini M *et al.* Effects of uraemic serum, urea, creatinine and methylguanidine on glucose metabolism. *Clin Sci* 1972; 42: 395–404
35. Johnson WJ, Hagge WW, Wagoner RD *et al.* Effects of urea loading in patients with far-advanced renal failure. *Mayo Clin Proc* 1972; 47: 21–29
36. Kraus LM, Traxinger R, Kraus AP. Uremia and insulin resistance: N-carbamoyl-asparagine decreases insulin-sensitive glucose uptake in rat adipocytes. *Kidney Int* 2004; 65: 881–887
37. Haap M, Heller E, Thamer C *et al.* Association of serum phosphate levels with glucose tolerance, insulin sensitivity and insulin secretion in non-diabetic subjects. *Eur J Clin Nutr* 2006; 60: 734–739
38. Hagstrom E, Hellman P, Lundgren E *et al.* Serum calcium is independently associated with insulin sensitivity measured with euglycaemic-hyperinsulinaemic clamp in a community-based cohort. *Diabetologia* 2007; 50: 317–324
39. Kalaitzidis R, Tsimihodimos V, Bairaktari E *et al.* Disturbances of phosphate metabolism: another feature of metabolic syndrome. *Am J Kidney Dis* 2005; 45: 851–858
40. Nowicki M, Fliser D, Fode P *et al.* Changes in plasma phosphate levels influence insulin sensitivity under euglycemic conditions. *J Clin Endocrinol Metab* 1996; 81: 156–159
41. Paula FJ, Plens AE, Foss MC. Effects of hypophosphatemia on glucose tolerance and insulin secretion. *Horm Metab Res* 1998; 30: 281–284
42. Ghanekar H, Welch BJ, Moe OW *et al.* Post-renal transplantation hypophosphatemia: a review and novel insights. *Curr Opin Nephrol Hypertens* 2006; 15: 97–104
43. Evenepoel P, Naesens M, Claes K *et al.* Tertiary 'hyperphosphatemia' accentuates hypophosphatemia and suppresses calcitriol levels in renal transplant recipients. *Am J Transplant* 2007; 7: 1193–2000
44. Barzi F, Woodward M. Imputations of missing values in practice: results from imputations of serum cholesterol in 28 cohort studies. *Am J Epidemiol* 2004; 160: 34–45
45. Gannon MC, Nuttall FQ. Effect of a high-protein, low-carbohydrate diet on blood glucose control in people with type 2 diabetes. *Diabetes* 2004; 53: 2375–2382
46. Montori VM, Basu A, Erwin PJ *et al.* Response to Hjelmæsæth *et al.* *Diabetes Care* 2002; 25: 1667–1668

Received for publication: 8.7.09; Accepted in revised form: 28.9.09
